# Supplementary material for: Factors Influencing Consumption Behaviour towards Aquatic Food among Asian Consumers: A Systematic Scoping Review
Source: MDPI journal article supplement (doi:10.3390/foods11244043), 2022-12-14
Supplement: s1 [file s1]

## Supplementary Material

**Table S1. Framework for determining identified publication's individual score (adopted from the Ref. [1]).**

| Indicator   | Criteria                                                                                                                                                                                                                                                                                                                                                                                                      |
|-------------|---------------------------------------------------------------------------------------------------------------------------------------------------------------------------------------------------------------------------------------------------------------------------------------------------------------------------------------------------------------------------------------------------------------|
| Validity    | <ol style="list-style-type: none"> <li>1. 'Are the findings substantiated by the data and has consideration been given to limitations of the methods that may have affected the results?'</li> <li>2. 'Are there issues in applying the method to some research question(s), i.e., was the methodology adequate for the research question?'</li> </ol>                                                        |
| Rigour      | <ol style="list-style-type: none"> <li>1. Is the context or setting adequately described?</li> <li>2. Is (are) the research question(s) clear?</li> <li>3. Is the method used appropriately to answer the research question(s)?</li> <li>4. Is the method applied correctly?</li> <li>5. Is there evidence that the data collection was rigorously conducted to ensure confidence in the findings?</li> </ol> |
| Reliability | <ol style="list-style-type: none"> <li>1. Is the data analysis rigorously conducted to ensure confidence in the findings?</li> <li>2. Is the methodology adequately described to ensure confidence in the findings?</li> </ol>                                                                                                                                                                                |

**Table S2. Criteria for evaluating the size, quality, and consistency within the identified research clusters (adapted from the Ref. [1]).**

| Indicators  | Categories   | Criteria                                                                                                                                                    |
|-------------|--------------|-------------------------------------------------------------------------------------------------------------------------------------------------------------|
| Size        | Large        | >10 documents                                                                                                                                               |
|             | Medium       | $5 \geq$ and $10 \leq$                                                                                                                                      |
|             | Small        | <5                                                                                                                                                          |
| Quality     | High         | >0.75 scores across all three indicators i.e., validity, rigour, and reliability                                                                            |
|             | Moderate     | <0.75 at least one score, but >0.5 at least two scores                                                                                                      |
|             | Low          | <0.5 scores at least two scores                                                                                                                             |
| Consistency | Consistent   | A range of studies with identical, or similar conclusions.                                                                                                  |
|             | Inconsistent | Different studies point to a range of conclusions. For instance, different designs or methods applied in different contexts resulting contrasting findings. |

**Table S3. Information on selected publications.**

[Research Cluster 1 (RED) = **Product attributes, availability, and accessibility**; Research Cluster 2 (Yellow) = **Willingness to pay for aquatic foods**; Research Cluster 3 (Purple) = **Psychosocial factors**; Research Cluster 4 (Blue) = **Sociodemographic and lifestyle factors**; Research Cluster 5 (Green) = **Aquatic food miscellaneous factors**]

| Ref. | Author(s)            | Year | Focus                                      | Country    | Research design, sampling, data collection method and period                          | Sample size | Sample composition                                                | Age range                     | Data analysis method                    | Type of products analysed    |
|------|----------------------|------|--------------------------------------------|------------|---------------------------------------------------------------------------------------|-------------|-------------------------------------------------------------------|-------------------------------|-----------------------------------------|------------------------------|
| [2]  | Chuenba and Sawmong  | 2018 | Determinants of canned seafood product     | Thailand   | Cross-sectional, systematic random, face-to-face interview, Sep 2016                  | 400         | Consumers who purchased and consumed canned and processed seafood | 21-60 and older               | Structural equation modelling           | Canned and processed seafood |
| [3]  | Devadawson et al.    | 2015 | Drivers and barriers to fish consumption   | Sri Lanka  | Cross-sectional, purposive, face-to-face interview, Dec 2013 – Oct 2014               | 150         | Consumer who purchases and consume fish                           | n/a                           | Quantitative descriptive analysis       | Fish and seafood in general  |
| [4]  | Das et al.           | 2013 | Drivers and barriers to fish consumption   | India      | Cross-sectional, multistage stratified random, face to face interview, June-July 2011 | 160         | Fish consumers                                                    | 25 and younger – 45 and older | Rank-based quotient                     | Fish and seafood in general  |
| [5]  | Akter et al.         | 2019 | Drivers and barriers to fish consumption   | Bangladesh | Cross-sectional, purposive, face-to-face interview, Feb 2018                          | 100         | Households participated in USAID funded projects                  | n/a                           | One way ANOVA and Tukey's post hoc test | Fish in general              |
| [6]  | Chokenu et al.       | 2019 | Drivers and barriers to fish consumption   | Thailand   | Cross-sectional, multi-stage simple random, face-to-face interview, Oct 2015-Dec 2015 | 700         | Consumer purchased processed fish products                        | n/a                           | Structural equation modelling           | Processed fish products      |
| [7]  | Chuenba et al.       | 2021 | Drivers and barriers to fish consumption   | Thailand   | Cross-sectional, systematic random, face-to-face interview, n/a                       | 400         | All types of consumers                                            | n/a                           | Structural equation modelling           | Canned tuna                  |
| [8]  | Hossain et al.       | 2021 | Consumers' preferences for fish attributes | Bangladesh | Cross-sectional, stratified simple random, self-administered, Nov 2017-Feb 2018       | 300         | All types of consumers                                            | n/a                           | Hedonic price model                     | Tilapia                      |
| [9]  | Hossain              | 2021 | Consumers' preferences for fish attributes | Bangladesh | Cross-sectional, simple random, face-to-face interview, Dec 2020                      | 200         | All types of consumers                                            | 35 and younger-45 and older   | Hedonic price model                     | Fish in general              |
| [10] | Intyas and Primyasta | 2020 | Consumers' preferences for fish attributes | Indonesia  | Cross-sectional, convenience, face-to-face interview, n/a                             | 38          | Consumers of preserved Mackerel tuna fish products                | 20 and younger-49             | Cross-tabulation, multiple              | Mackerel tuna fish           |

|      |                  |      |                                               |             |                                                                                                                |                                 |                                                  |                               |                                                                           |                          |
|------|------------------|------|-----------------------------------------------|-------------|----------------------------------------------------------------------------------------------------------------|---------------------------------|--------------------------------------------------|-------------------------------|---------------------------------------------------------------------------|--------------------------|
|      |                  |      |                                               |             |                                                                                                                |                                 |                                                  |                               | regression, F test and t-test                                             |                          |
| [11] | Mitra et al.     | 2021 | Consumers' preferences for fish attributes    | Bangladesh  | Cross-sectional, simple random, face-to-face interview, Feb 2019 – Mar 2020                                    | 138                             | Consumers who buy capture and culture fishes     | n/a                           | Logit model, hedonic pricing model                                        | Capture and culture fish |
| [12] | Tan et al.       | 2017 | Consumers' preferences for fish attributes    | Philippines | Cross-sectional, multistage stratified random, face to face, NA                                                | 378                             | All types of consumers                           | 20 and younger-60 and older   | Descriptive statistics, ordinal least square regression                   | Milkfish                 |
| [13] | Uddin et al.     | 2019 | Drivers and barriers to fish consumption      | Bangladesh  | Cross-sectional, purposive random, face to face, NA                                                            | 150                             | All types of consumers                           | 15 and younger-55 and older   | Descriptive statistics, Logit model                                       | Pangas and Tilapia Fish  |
| [14] | Wang et al.      | 2021 | Consumers' preferences for fish attributes    | China       | Cross-sectional, convenience, web-based questionnaire, Dec 2016                                                | 981                             | All types of consumers                           | 32.1±n/a                      | Descriptive statistic, binary logistic regression                         | Lobster                  |
| [15] | Wang and Somogyi | 2018 | Drivers and barriers to shellfish consumption | China       | Cross-sectional, quota, web-based questionnaire, Dec 2016                                                      | 643                             | All types of consumers                           | 18 – 40 and older             | Descriptive statistics, structural equation modelling                     | Shellfish in general     |
| [16] | Ahmed et al.     | 2011 | Drivers and barriers to fish consumption      | Malaysia    | Cross-sectional, simple random, face-to-face interview, Dec 2007                                               | 700                             | Household member responsible for purchasing food | 18 and younger – 55 and older | Descriptive statistics, Logit model                                       | Fresh fish               |
| [17] | Omar et al.      | 2011 | Drivers and barriers to fish consumption      | Malaysia    | Cross-sectional, convenience, self-administered, n/a                                                           | 212                             | Fish snack consumers                             | n/a                           | Cross-tabulation, correlation, t-test                                     | Fish snack               |
| [18] | Sajeev et al.    | 2021 | Drivers and barriers to fish consumption      | India       | Cross-sectional, purposive random, face-to-face interview, 2019-2020                                           | 97                              | Consumers purchasing fish online                 | 39.28±11.13                   | Cross-tabulation, ordinal alternative least square                        | Fish in general          |
| [19] | Wijayanto et al. | 2021 | Drivers and barriers to fish consumption      | Indonesia   | Cross-sectional, cluster, self-administered, 2019                                                              | 720                             | All types of consumers                           | 32 and younger-59 and older   | Regression and correlational analysis                                     | Fresh shrimp             |
| [20] | Linh et al.      | 2019 | Drivers and barriers to fish consumption      | Vietnam     | Cross-sectional, convenience, self-administered, n/a                                                           | 300                             | All types of consumers                           | 20-35 and older               | Word association, factor analysis,                                        | Fish sauce products      |
| [21] | Castro et al.    | 2016 | Consumers' preferences for fish attributes    | Philippines | Two stages, focus group, convenience, Jun-Jul 2015 + cross-sectional, convenience, face-to-face interview, n/a | 69 (focus group) + 204 (survey) | Consumers who purchase canned tuna               | 16-75                         | Content analysis + hierarchical and k-mean cluster analysis, probit model | Canned tuna              |

|      |                     |      |                                            |            |                                                                                                   |                                  |                                                                         |                               |                                                          |                             |
|------|---------------------|------|--------------------------------------------|------------|---------------------------------------------------------------------------------------------------|----------------------------------|-------------------------------------------------------------------------|-------------------------------|----------------------------------------------------------|-----------------------------|
| [22] | Izzhati et al.      | 2018 | Drivers and barriers to fish consumption   | Indonesia  | Two stages, Focus group + conjoint analysis, Cross sectional, convenience, self-administered, n/a | n/a + 100                        | All types of consumers                                                  | 18-60                         | Content analysis + cross tabulation, correlation         | Smoked fish                 |
| [23] | Rejula et al.       | 2021 | Drivers and barriers to fish consumption   | India      | Cross-sectional, purposive random, face-to-face interview, Dec 2018-Mar 2020                      | 400                              | Fish consuming households                                               | 19-77                         | Cross-tabulation                                         | Fish in general             |
| [24] | Mugaonkar et al.    | 2011 | Consumers' preferences for fish attributes | India      | Two-stage, convenience, face to face interview + sensory evaluation, Jan-Feb 2009                 | 140 (survey) + 50 (sensory test) | All types of consumers + willingness to taste value-based products      | 25 and younger – 35 and older | Cross-tabulation, factor analysis                        | Fish in general             |
| [25] | Zaeema and Hassan   | 2016 | Drivers and barriers to fish consumption   | Maldives   | Cross-sectional, convenience, self-administered, n/a                                              | 450                              | All types of consumers                                                  | 18 to 50 and older            | Structural equation modelling, one way ANOVA             | Canned tuna                 |
| [26] | Sajiki and Lu       | 2022 | Drivers and barriers to fish consumption   | Japan      | Cross-sectional, convenience, web-based questionnaire, Nov 2018                                   | 1000                             | Household member responsible for purchasing seafood                     | 20 or older                   | Conditional logit model and random parameter logit model | Raw fish                    |
| [27] | Kitano and Yamamoto | 2020 | Drivers and barriers to fish consumption   | Japan      | Cross-sectional, convenience, web-based questionnaire, n/a                                        | 493                              | Consumers responsible for household's fresh food purchasing decision    | 50.89±16.0                    | Factor analysis, Poisson model, ordinal least square     | Fish in general             |
| [28] | Mugaonkar et al.    | 2013 | Drivers and barriers to fish consumption   | India      | Cross-sectional, simple random, face-to-face interview, Jul-Oct 2012                              | 120                              | Household member responsible for food purchasing/cooking                | n/a                           | Ordered probit model                                     | Fish and seafood in general |
| [29] | Alam and Alfnes     | 2020 | Consumers' preferences for fish attributes | Bangladesh | Cross-sectional, convenience, face-to-face interview, Feb-Mar 2016                                | 400                              | Household heads responsible for at least 50% of food purchasing         | 25-60                         | Mixed logit model                                        | Pangasius and Rohu          |
| [30] | Ariji               | 2010 | Consumers' preferences for fish attributes | Japan      | Cross-sectional, convenience, web-based questionnaire, Mar 2009                                   | 12000                            | All types of consumers                                                  | 20-40 and older               | Conjoint analysis                                        | Bluefin tuna                |
| [31] | Hoque               | 2021 | Consumers' preferences for fish attributes | Bangladesh | Cross-sectional, convenience, face-to-face interview, Aug -Oct 2018                               | 490                              | Household member responsible for buying fish                            | 20-69                         | Multinomial logit model, latent class logit model        | Fish in general             |
| [32] | Mohammed et al.     | 2021 | Consumers' preferences for fish attributes | Bangladesh | Cross-sectional, stratified random, face-to-face interview, Aug-Oct 2019                          | 660                              | Household member responsible for buying fish                            | 33.93±8.97                    | Descriptive analysis, Rank-ordered logit model           | Shrimp                      |
| [33] | Hoque and Alam      | 2020 | Drivers and barriers to fish consumption   | Bangladesh | Cross-sectional, stratified random, face-to-face, Mar-Apr 2018                                    | 498                              | households who prefer fish and are responsible for buying for household | 20-70 and older               | Structural equation modelling                            | Farmed fish in general      |

|      |                  |      |                                            |             |                                                                                   |                              |                                                          |                             |                                                                                              |                               |
|------|------------------|------|--------------------------------------------|-------------|-----------------------------------------------------------------------------------|------------------------------|----------------------------------------------------------|-----------------------------|----------------------------------------------------------------------------------------------|-------------------------------|
| [34] | Hoque et al.     | 2021 | Drivers and barriers to fish consumption   | Bangladesh  | Cross-sectional, random, face-to-face interview, Jan-Apr 2019                     | 1053                         | All types of consumers                                   | 41.25±13.28                 | Structural equation modelling                                                                | Farmed fish in general        |
| [35] | Hori et al.      | 2020 | Consumers' preferences for fish attributes | Japan       | Cross-sectional, convenience, web-based questionnaire, 2017 and 2019              | 3000                         | All types of consumers                                   | 20 and older                | Factor analysis, multiple regression analysis, marginal willingness to pay                   | Fish and seafood in general   |
| [36] | Karnad et al.    | 2021 | Drivers and barriers to fish consumption   | India       | Two stage, semi-structured interview + cross-sectional, convenience, Jun-Oct 2018 | 40 (interview)+ 531 (survey) | Seafood eaters                                           | 20 and younger-60 and older | Content analysis + crosstabulation                                                           | Fish and seafood in general   |
| [37] | Kim and Lee      | 2018 | Drivers and barriers to fish consumption   | South Korea | Cross-sectional, simple random, web-based questionnaire, Jun-Jul 2017             | 2773                         | Household member responsible for food purchasing/cooking | 20-69                       | Descriptive statistics, ordered probit model                                                 | Seafood in general            |
| [38] | Murakami et al.  | 2017 | Drivers and barriers to fish consumption   | Japan       | Cross-sectional, simple random, web-based questionnaire, Dec 2015                 | 1148                         | All types of consumers                                   | 20-69                       | Post-hoc test, logistic regression, t-test                                                   | Fish and shellfish in general |
| [39] | Prince and Wahid | 2020 | Drivers and barriers to fish consumption   | Bangladesh  | Cross-sectional, stratified random, face to face interview, Mar-Jun 2020          | 320                          | Organic fish consumers                                   | 24-60 and older             | Structural Equation modelling                                                                | Organic fish                  |
| [40] | Zheng et al.     | 2021 | Consumers' preferences for fish attributes | China       | Cross-sectional, simple random, face-to-face interview, 2015                      | 1017                         | All types of consumers                                   | 37.20±13.51                 | Descriptive statistics, random parametric logit model, ordinal least square regression model | Salmon                        |
| [41] | Omar et al.      | 2021 | Drivers and barriers to fish consumption   | Malaysia    | Cross sectional survey, purposive, self-administered, NA                          | 307                          | Sardine consumers                                        | NA                          | Structural equation modelling                                                                | Canned sardine                |
| [42] | Sayeed et al.    | 2021 | Consumers' preferences for fish attributes | Singapore   | Cross-sectional, stratified, web-based questionnaire, Mar-Apr 2021                | 312                          | All types of consumers                                   | 18-55 and above             | Descriptive statistics, conditional logit model                                              | Mud crabs                     |
| [43] | Tan              | 2017 | Drivers and barrier to fish consumption    | Philippines | Cross-sectional, multistage stratified random, face-to face interview, n/a        | 378                          | All types of consumers                                   | 20 and younger-60 and older | Cross-tabulation, One-way ANOVA                                                              | Milkfish                      |
| [44] | Uchida et al.    | 2014 | Consumers' preferences for fish attributes | Japan       | Cross sectional, convenience, web-based questionnaire, Mar 2009                   | 3370                         | All types of consumers                                   | 42.5±10.6                   | Mixed logit model                                                                            | Eco labelled seafood          |

|      |                      |      |                                            |             |                                                                                                                             |                              |                                                                                             |                             |                                                                                          |                      |
|------|----------------------|------|--------------------------------------------|-------------|-----------------------------------------------------------------------------------------------------------------------------|------------------------------|---------------------------------------------------------------------------------------------|-----------------------------|------------------------------------------------------------------------------------------|----------------------|
| [45] | Wakamatsu et al.     | 2017 | Consumers' preferences for fish attributes | Japan       | Cross-sectional, convenience, face-to-face interview, Jun 2009                                                              | 159                          | Females who are responsible for purchasing/cooking food                                     | 40 and younger-50 and older | Latent class, multinomial logit, Chi-Square                                              | Eco labelled seafood |
| [46] | Wakamatsu and Miyata | 2017 | Consumers' preferences for fish attributes | Japan       | Cross-sectional, convenience, web-based questionnaire, Nov 2015                                                             | 2378                         | General domestic seafood consumers                                                          | 15-60                       | Random utility model, conditional logit model                                            | Seafood in general   |
| [47] | Xu et al.            | 2012 | Consumers' preferences for fish attributes | China       | Cross-sectional, convenience, face-to-face interview, Nov 2009                                                              | 386                          | All types of consumers                                                                      | 39.53±13.38                 | Descriptive analysis, probit regression                                                  | Seafood in general   |
| [48] | Xuan et al.          | 2021 | Drivers and barriers to fish consumption   | Vietnam     | Cross-sectional, stratified random quota, face to face interview, Mar-Apr 2019                                              | 754                          | All types of consumers                                                                      | 36.79±12.89                 | Cross-tabulation, ordered logistic regression, multiple indicators multiple causes model | Shrimp               |
| [49] | Xuan                 | 2021 | Consumers' preferences for fish attributes | Vietnam     | Cross-sectional, random quota, face-to-face interview, Mar-Apr 2019                                                         | 353                          | Household member responsible for purchasing/cooking food                                    | 37.38±11.43                 | Multinomial logit model, mixed-logit model                                               | Aquaculture products |
| [50] | Yi                   | 2019 | Drivers and barriers to fish consumption   | South Korea | Cross-sectional, stratified, web-based questionnaire, Nov-Dec 2018                                                          | 960                          | All types of consumers                                                                      | 20-60 and older             | Descriptive statistics, structural equation model                                        | Aquaculture products |
| [51] | Yi                   | 2019 | Drivers and barriers to fish consumption   | South Korea | Cross-sectional, convenience, web-based questionnaire, n/a                                                                  | 1000                         | All types of consumers                                                                      | 20-60 and older             | Factor analysis, double bounded dichotomous choice model, contingent valuation model     | Red seabream         |
| [52] | Yin et al.           | 2020 | Consumers' preferences for fish attributes | China       | Two stages, focus group: convenience, Oct-Nov 2016 + cross-sectional, simple random, face-to-face interview, Jan - Mar 2018 | Focus group n/a + survey 996 | Household member responsible for purchasing and had purchased seafood within the last month | 18 and older                | n/a + descriptive statistics, generalised mixed logit model                              | White shrimp         |
| [53] | Zhang et al.         | 2020 | Consumers' preferences for fish attributes | China       | Cross-sectional, purposive, web-based questionnaire, May -Jun 2018                                                          | 372                          | Seafood and salmon consumers                                                                | 18 and older                | Mixed logit model, conditional logit model, equality constrained latent class            | Salmon               |

|      |                       |      |                                             |            |                                                                             |        |                                                              |                               |                                                                |                            |
|------|-----------------------|------|---------------------------------------------|------------|-----------------------------------------------------------------------------|--------|--------------------------------------------------------------|-------------------------------|----------------------------------------------------------------|----------------------------|
| [54] | Peng et al.           | 2021 | Drivers and barriers to fish consumption    | China      | Secondary data analysis, face-to-face interview, 2004, 2006, 2009           | 13,386 | Households from the China Health and Nutrition Survey (CHNS) | 48.96±15.22                   | Chi-Square, Tobit model                                        | Seaweed                    |
| [55] | Ghosh et al.          | 2018 | Drivers and barriers to fish consumption    | India      | Cross-sectional, simple random, face to face interview, Dec 2014 - Feb 2015 | 120    | All types of consumers                                       | 15 – 60 and older             | Rank-based quotient                                            | Ready to eat fish products |
| [56] | Abidin et al.         | 2021 | Drivers and barriers to fish consumption    | Indonesia  | Cross-sectional, convenience, web-based questionnaire, n/a                  | 144    | Fish consumers                                               | 20-23                         | Structural equation modelling                                  | Fishery functional foods   |
| [57] | Chen and Wang         | 2021 | Drivers and barriers to fish consumption    | China      | Cross-sectional, random stratified, web-based questionnaire, Jun 2020       | 1096   | All types of consumers                                       | 30 and younger – 60 and older | Structural equation modelling                                  | Wild freshwater fish       |
| [58] | Dai et al.            | 2021 | Drivers and barriers to fish consumption    | China      | Cross-sectional, convenience, web-based questionnaire, May – July 2019      | 4221   | All types of consumers                                       | 18 and older                  | Multinomial ordinal logistic regression model                  | Aquatic products           |
| [59] | Fiandari et al.       | 2019 | Drivers and barriers to fish consumption    | Indonesia  | Cross-sectional, Convenience, face-to-face interview, Jun 2017-Feb 2018     | 365    | Consumed fish for at least one year                          | 17 and older                  | Structural equation modelling                                  | Fish in general            |
| [60] | Gajaria and Mantri    | 2021 | Drivers and barriers to seaweed consumption | India      | Cross-sectional, convenience, web-based questionnaire, Jun 2020 – Jun 2020  | 310    | All types of consumers                                       | 15-50 and older               | Student's t-test, ANOVA                                        | Seaweed                    |
| [61] | Ghifarini et al.      | 2018 | Drivers and barriers to fish consumption    | Indonesia  | Cross-sectional, Purposive, web-based questionnaire, Jan- Feb 2016          | 120    | All types of consumers                                       | 30 and younger- 40 and older  | Structural equation modelling                                  | Shrimp                     |
| [62] | Li and Zhong          | 2017 | Drivers and barriers to fish consumption    | China      | Cross-sectional, convenience, web-based questionnaire, May-Jun 2016         | 337    | All types of consumers                                       | 18 and younger- 60            | Structural equation modelling                                  | Green aquatic products     |
| [63] | Novita and Rowena     | 2019 | Drivers and barriers to fish consumption    | Indonesia  | Cross-sectional, convenience, self-administered, n/a                        | 307    | All types of consumers                                       | 20-50                         | Structural equation modelling                                  | Fish in general            |
| [64] | Pethiyagoda and Olsen | 2013 | Drivers and barriers to fish consumption    | Sri Lanka  | Cross sectional, convenience, face to face interview, NA                    | 207    | All types of consumers                                       | 33±12                         | Confirmatory factor analysis and structural equation modelling | Fish in general            |
| [65] | Quan et al.           | 2014 | Drivers and barriers to fish consumption    | China      | Cross sectional, simple random, face to face interview, Nov 2009            | 386    | All types of consumers                                       | 21-60                         | Structural Equation modelling                                  | Eco labelled fish          |
| [66] | Siddique              | 2012 | Consumers' preferences for fish attributes  | Bangladesh | Cross-sectional, convenience, face to face, Feb-Apr 2011                    | 558    | All types of consumers                                       | 18-45                         | Exploratory factor analysis, multiple regression               | Dry fish                   |
| [67] | Thong and Olsen       | 2012 | Drivers and barriers to fish consumption    | Vietnam    | Cross sectional, convenience, face- to                                      | 208    | All types of consumers                                       | 25-55                         | Descriptive statistics, structural                             | Fish in general            |

|      |                   |      |                                                           |           |                                                                                                  |        |                                                          |                               |                                                                           |                             |
|------|-------------------|------|-----------------------------------------------------------|-----------|--------------------------------------------------------------------------------------------------|--------|----------------------------------------------------------|-------------------------------|---------------------------------------------------------------------------|-----------------------------|
|      |                   |      |                                                           |           | face interview, Aug 2006                                                                         |        |                                                          |                               | equation modelling                                                        |                             |
| [68] | Wang and Somogyi  | 2019 | Drivers and barriers to fish consumption                  | China     | Cross-sectional, quota stratified random, web-based questionnaire, Dec 2016                      | 643    | All types of consumers                                   | 18-40 and older               | Descriptive statistics, structural equation modelling                     | Shellfish in general        |
| [69] | Fauziyah          | 2020 | Drivers and barriers to fish consumption                  | India     | Cross-sectional, convenience, face-to-face interview, Apr 2019                                   | 150    | Adolescents                                              | 15-17                         | Chi-Square, multiple logistic regression                                  | Fish in general             |
| [70] | Junaidi et al.    | 2020 | Drivers and barriers to fish consumption                  | Indonesia | Cross-sectional, convenience, web-based questionnaire, n/a                                       | 55     | All types of consumers                                   | 26-40                         | Structural equation modelling                                             | Fresh fish                  |
| [71] | Ho Huy et al.     | 2013 | Drivers and barriers to fish consumption                  | Vietnam   | Cross-sectional, convenience, face-to-face interview, n/a                                        | 466    | Eat fish at least once a week                            | 18-76                         | Structural equation modelling                                             | Fish and seafood in general |
| [72] | Duy and Ai        | 2019 | Drivers and barriers to fish consumption                  | Vietnam   | Cross-sectional, systematic random, self-administration, n/a                                     | 299    | All types of consumers                                   | n/a                           | Factor analysis, linear regression model                                  | Fish and seafood in general |
| [73] | Rotuauli et al.   | 2020 | Drivers and barriers to fish consumption                  | Indonesia | Cross-sectional, accidental, self-administered, n/a                                              | 100    | All types of consumers                                   | 21-69                         | Cross-tabulation, correlation                                             | Freshwater fish             |
| [74] | Muganokar et al.  | 2017 | Drivers and barriers to fish consumption                  | India     | Cross-sectional, convenience, face to face interview, 2012                                       | 120    | Fish consumers                                           | 15 and younger – 45 and older | Rank-based Quotient                                                       | Pangasius                   |
| [75] | Danso et al.      | 2017 | Consumers' preferences for fish attributes                | Vietnam   | Cross-sectional, simple random, face-to-face interview, 2014                                     | 136    | Household member responsible for food purchasing/cooking | 25 and younger- 65 and older  | Latent class model, conditional logit and random parameters logit models. | Fish products               |
| [76] | Ahmad et al.      | 2016 | Drivers and barriers to fish consumption                  | Malaysia  | Cross-sectional, two-stage proportionate stratified, face-to-face interview, Feb 2008 – May 2009 | 2675   | Household member responsible for food purchasing/cooking | 43.4±16.2                     | Student's t-test, one way ANOVA, Mann-Whitney U and Kruskal-Wallis H test | Fish in general             |
| [77] | Arthatiani et al. | 2021 | Socio-economic determinants of preserved fish consumption | Indonesia | Data were taken from the National socio-economic survey for Indonesia, 2019                      | 96,360 | All types of consumers                                   | 40 and younger – 55 and older | Probit regression model                                                   | Preserved fish              |
| [78] | Devadawson et al. | 2015 | Drivers and barriers to fish consumption                  | Sri Lanka | Cross-sectional, stratified random, face-to-face interview, 2014                                 | 1777   | Fish consumers                                           | 25-75                         | Cross-tabulation, Kruskal – Wallis test                                   | Fish in general             |



|      |                  |      |                                               |             |                                                                                     |                   |                                                          |                               |                                                  |                       |
|------|------------------|------|-----------------------------------------------|-------------|-------------------------------------------------------------------------------------|-------------------|----------------------------------------------------------|-------------------------------|--------------------------------------------------|-----------------------|
| [79] | Fu et al.        | 2019 | Drivers and barriers to fish consumption      | China       | Cross-sectional, simple random, face-to-face interview, Jun 2017-Jan 2018           | 451               | All types of consumers                                   | 36.36±17.74                   | Mann-Whitney U-tests, Kruskal-Wallis tests       | Asian horseshoe crabs |
| [80] | Haque et al.     | 2019 | Drivers and barriers to fish consumption      | Bangladesh  | Cross-sectional, convenience, quota-based, self-administered, 2018                  | 120               | Household member responsible for purchasing seafood      | 35 and younger-60 and older   | Descriptive statistics and chi-square            | Fish in general       |
| [81] | Hoa and Kare     | 2017 | Drivers and barriers to fish consumption      | Vietnam     | Cross-sectional, purposive, Face-to-face interview, 2010                            | 413               | Teenagers                                                | 12-20                         | Factor analysis, t-test and ANOVA                | Fish in general       |
| [82] | Islam et al.     | 2018 | Drivers and barriers to fish consumption      | Bangladesh  | Cross-sectional, convenience, self-administered, n/a                                | 658               | Consumers responsible for their household purchasing     | 16 to 65 and older            | Factor analysis, cross-tabulation, F-test        | Fish in general       |
| [83] | Kashem et al.    | 2021 | Drivers and barriers to fish consumption      | Bangladesh  | Cross-sectional, convenience, web-based questionnaire, Jul-Aug 2020                 | 300               | All types of consumers                                   | 24 and younger – 45 and older | Descriptive statistic, correlation               | Fish in general       |
| [84] | Lee and Nam      | 2019 | Drivers and barriers to fish consumption      | South Korea | Cross-sectional, stratified random sampling, telephone-based interview, Jul 2012    | 800               | Household member responsible for food purchasing/cooking | 20-69                         | Descriptive statistics, ordered Probit model     | Live fish             |
| [85] | Poti et al.      | 2021 | Drivers and barriers to fish consumption      | Malaysia    | Case study, opportunistic, semi-structured interview, Jul-Sep 2017                  | 73                | Household member responsible for buying fish             | 20-80                         | Binary logistic regression                       | Sea turtle egg        |
| [86] | Rahman and Islam | 2020 | Consumers' preferences for fish attributes    | Bangladesh  | Cross-sectional, simple random, self-administered, Dec 2019-Jan 2020                | 128               | All types of consumers                                   | n/a                           | Linear regression                                | Fish in general       |
| [87] | Sajeev et al.    | 2021 | Drivers and barriers to fish consumption      | India       | Cross-sectional, stratified proportional, face-to-face interview, Dec 2019-Feb 2020 | 200               | Household member responsible for purchasing food         | n/a                           | Cross-tabulation, Henry Garret ranking test      | Fish in general       |
| [88] |                  | 2020 | Drivers and barriers to fish consumption      | India       | Cross-sectional, simple random, self-administered, n/a                              | n/a               | All types of consumers                                   | n/a                           | Cross-tabulation                                 | Fish in general       |
| [89] | Supartini et al. | 2018 | Drivers and barriers to fish consumption      | Singapore   | Cross-sectional survey, stratified random, web-based questionnaire, Jan 2017        | 600               | All types of consumers                                   | 20-69                         | Chi-Square, t-test, multiple logistic regression | Fish in general       |
| [90] | Zhou et al.      | 2015 | Drivers and barriers to shellfish consumption | China       | Secondary data analysis – China Health and Nutrition Survey (2000, 2004, 2006)      | 731, 918 and 1083 | Household member responsible for purchasing/cooking food | n/a                           | Generalised least square regression model        | Fish in general       |
| [91] | Yadav et al.     | 2021 | Drivers and barriers to fish consumption      | Maldives    | Cross-sectional, convenience, face-to-face interview, n/a                           | 100               | Household member responsible for purchasing/cooking food | 18-80                         | Two-way ANOVA, generalised linear mixed model    | Reef fish and tuna    |

|       |                  |      |                                               |          |                                                                                     |                                        |                                                          |                             |                                                                                            |                             |
|-------|------------------|------|-----------------------------------------------|----------|-------------------------------------------------------------------------------------|----------------------------------------|----------------------------------------------------------|-----------------------------|--------------------------------------------------------------------------------------------|-----------------------------|
| [92]  | Tezzo et al.     | 2021 | Fish consumption practices                    | Myanmar  | Qualitative case study, purposive, semi-structured interview, n/a                   | 13 households, 46 individuals in total | All types of consumers                                   | 28-62                       | Social practices approach + Thematic analysis                                              | Fish in general             |
| [93]  | Salim et al.     | 2020 | Drivers and barriers to fish consumption      | India    | Cross-sectional, purposive and simple random, face-to-face interview Mar-May 2019   | 355                                    | Fish consumers                                           | 25-60                       | Cross-tabulation                                                                           | Fish in general             |
| [94]  | Gohet et al.     | 2013 | Drivers and barriers to fish consumption      | Malaysia | Cross-sectional, purposive, self-administered, 2015-2016                            | 385                                    | All types of consumers                                   | 18 – 60 and older           | Cross-tabulation, ANOVA, Tukey post hoc                                                    | Fish and seafood in general |
| [95]  | Salim            | 2020 | Consumers' preferences for fish attributes    | India    | Cross-sectional, convenience, self-administered, Jan-Dec 2012                       | 600                                    | Household member responsible for buying fish             | 35 and younger-60 and older | Cross tabulation, logit model                                                              | Fish and seafood in general |
| [96]  | Zhang et al.     | 2021 | Drivers and barriers to shellfish consumption | China    | Cross-sectional, stratified, face-to-face interview, 2012-2016                      | 1201                                   | Household member responsible for purchasing/cooking food | 44 and younger - 89         | Ordered probit model, Tobit model                                                          | Fish and seafood in general |
| [97]  | Huang et al.     | 2020 | Drivers and barriers to fish consumption      | China    | Cross-sectional, probability-proportional-to-size, face-to face interview, Aug 2018 | 424                                    | Household member responsible for food purchasing/cooking | 52.33±12.66                 | Structural equation modelling                                                              | Fish in general             |
| [98]  | Zheng et al.     | 2017 | Drivers and barriers to fish consumption      | China    | Cross-sectional, simple random, face-to-face survey, Jun-Jul 2015                   | 1017                                   | All types of consumers                                   | 37.80-13.51                 | Cross tabulation                                                                           | Alaska salmon               |
| [99]  | Zheng et al.     | 2018 | Drivers and barriers to shellfish consumption | China    | Cross-sectional, simple random, face-to-face interview, Jun-Jul 2015                | 1017                                   | All types of consumers                                   | 18-85                       | Descriptive statistics, ordered logit model                                                | Wild salmon                 |
| [100] | Wang et al.      | 2018 | Drivers and barriers to fish consumption      | China    | Cross-sectional, purposive, web-based questionnaire, Dec 2016                       | 882                                    | Consumed lobster before                                  | 18-41 and older             | Cross-tabulation, t-test, one way ANOVA, partial least squares regression                  | Lobster                     |
| [101] | Wang and Somogyi | 2020 | Drivers and barriers to fish consumption      | China    | Cross-sectional, convenience, web-based questionnaire, May 2018                     | 967                                    | All types of consumers                                   | 18-70                       | Descriptive statistic, linear regression model, factor analysis, two-step cluster analysis | Seafood in general          |

|       |                       |      |                                             |           |                                                                                       |      |                                                                                                       |             |                                            |                             |
|-------|-----------------------|------|---------------------------------------------|-----------|---------------------------------------------------------------------------------------|------|-------------------------------------------------------------------------------------------------------|-------------|--------------------------------------------|-----------------------------|
| [102] | Skalerud et al.       | 2012 | Drivers and barriers to fish consumption    | China     | Cross-sectional, random stratified, telephone interview, NA                           | 1200 | Female member of the household                                                                        | 15-69       | Multinomial logit analysis                 | Norwegian salmon            |
| [103] | Meng et al.           | 2021 | Drivers and barriers to fish consumption    | China     | Convenience, face-to-face interview, simple random, self-administered, Jun 2016       | 394  | Household member responsible for food purchasing/cooking                                              | 39.24±12.22 | Descriptive statistics and Tobit model     | Aquatic products            |
| [104] | Juwitaningtyas et al. | 2018 | Consumers' preferences for fish attributes  | Indonesia | Cross-sectional, convenience, self-administered, n/a                                  | 101  | Fresh fish consumers                                                                                  | n/a         | Importance-performance analysis            | Fish in general             |
| [105] | Hu and Yuan           | 2015 | Drivers and barriers to fish consumption    | China     | Cross-sectional, purposive, self-administered, Dec 2011-Feb 2012                      | 1020 | University students                                                                                   | 19-30       | Cross-tabulation                           | Fish and seafood in general |
| [106] | Farradia and Sunarno  | 2020 | Drivers and barriers to fish consumption    | Indonesia | Cross-sectional, convenience, self-administered, n/a                                  | 107  | Consumers who prefer to buy online                                                                    | n/a         | Regression and correlation, ANOVA          | Fresh fish                  |
| [107] | Fabinyi et al.        | 2016 | Drivers and barriers to fish consumption    | China     | Cross-sectional, quota, web-based questionnaire, Jan – Mar 2015                       | 300  | All types of consumers                                                                                | 18-60       | Chi-Square test                            | Aquatic products            |
| [108] | Fabinyi and Liu       | 2014 | Drivers and barriers to seafood consumption | China     | Case study, Convenience, semi-structured interview, Apr – Jul 2012                    | 34   | 20 seafood restaurants managers or chefs, 7 seafood restaurant consumers, 7 trading sector informants | n/a         | Thematic analysis                          | Seafood in general          |
| [109] | Fabinyi and Liu       | 2016 | Drivers and barriers to seafood consumption | China     | Ethnographic study, interviews and observations, 2011-2014                            | n/a  | n/a                                                                                                   | n/a         | Thematic analysis                          | Seafood in general          |
| [110] | Newton et al.         | 2021 | Drivers and barriers to fish consumption    | China     | Cross-sectional, simple random, face-to face interview + web-based questionnaire, n/a | 267  | All types of consumers                                                                                | n/a         | Cross-tabulation                           | Fish and seafood in general |
| [111] | Altintzoglou et al.   | 2016 | Drivers and barriers to fish consumption    | Japan     | Cross-sectional, convenience, web-based questionnaire, n/a                            | 897  | All types of consumers                                                                                | 18-64       | Cross-tabulation, correlation, ANOVA tests | Sushi and sashimi           |

## References

1. Béné, C.; Arthur, R.; Norbury, H.; Allison, E.H.; Beveridge, M.; Bush, S.; Campling, L.; Leschen, W.; Little, D.; Squires, D.; et al. Contribution of Fisheries and Aquaculture to Food Security and Poverty Reduction: Assessing the Current Evidence. *World Development* **2016**, *79*, 177–196, <https://doi.org/10.1016/j.worlddev.2015.11.007>

2. Chuenban, P.; Sawmong, S. Determinants of Thailand's Canned Seafood Industry Product Identity: A Structural Equation Model Analysis. *Asia-Pacific Social Science Review* **2018**, *18*, 34–48.
3. Devadawson, C.; Jayasinghe, C.; Sivakanesan, R. Socio-demographic factors and fish eating trends in eastern community, sri lanka. *J. Exp. Biol. Agric. Sci.* **2015**, *3*, 423–429. [https://doi.org/10.18006/2015.3\(5\).423.429](https://doi.org/10.18006/2015.3(5).423.429)
4. Das, A.; Kumar, N.; Debnath, B.; Barman, D.; Datta, M. Fish Consumers' Behaviour at Selected Fish Markets of Tripura, India. *FISHERY TECHNOLOGY* **2013**, *50*, 185–190.
5. Akter, R.; Thilsted, S.; Hossain, N.; Ishihara, H.; Yagi, N. Fish Is the Preferred Animal-Source Food in the Rural Community of Southern Bangladesh. *SUSTAINABILITY* **2019**, *11*, 5764. <https://doi.org/10.3390/su11205764>
6. Chokenukul, P.; Sukhabot, S.; Rinthaisong, I. A Causal Relationship Model of Purchasing Behavior of Consumers in Thailand Regarding Processed Fish Products. *Kasetsart Journal of Social Sciences* **2019**, *40*, 366–372, <https://doi.org/10.1016/j.kjss.2017.10.006>
7. Chuenban, P.; Sornsaruht, P.; Pimdee, P. How Brand Attitude, Brand Quality, and Brand Value Affect Thai Canned Tuna Consumer Brand Loyalty. *Heliyon* **2021**, *7*, <https://doi.org/10.1016/j.heliyon.2021.e06301>
8. Hossain, A.; Badiuzzaman; Nielsen, M.; Hoque, S.; Roth, E. The Role of Private Companies in Improving Nutrition of Consumer Groups in a Developing Country: A Hedonic Analysis of Tilapia Attributes in Bangladesh. *Journal of Applied Aquaculture* **2021**, <https://doi.org/10.1080/10454438.2021.1872463>
9. Hossain, A. Quantity or Quality of Fish in a Developing Country: A Hedonic Analysis. *Journal of Applied Aquaculture* **2021**, <https://doi.org/10.1080/10454438.2021.1970687>
10. Intyas, C.A.; Primyastanto, M. Marketing Mix Development Analysis of Preserved Tongkol (Euthynnus Affinis) on Customer Satisfaction in Malang, East Java, Indonesia. In Proceedings of the IOP Conference Series: Earth and Environmental Science; May 1 2020; Vol. 493, p. 012043.
11. Mitra, S.; Khatun, M.N.; Prodhan, M.M.H.; Khan, M.A. Consumer Preference, Willingness to Pay, and Market Price of Capture and Culture Fish: Do Their Attributes Matter? *Aquaculture* **2021**, *544*, <https://doi.org/10.1016/j.aquaculture.2021.737139>
12. Tan, R.D.; Pabuayon, I.; Rola, A.; Sumalde, Z.M.; Yorobe, J.M. The Price of Fish Quality Attributes in the Province of Iloilo, Philippines: Estimates from Hedonic Pricing for Milkfish. *Asian Fisheries Science* **2017**, *30*, 101–117.
13. Uddin, M.T.; Rasel, M.H.; Dhar, A.R.; Badiuzzaman, M.; Hoque, M.S. Factors Determining Consumer Preferences for Pangas and Tilapia Fish in Bangladesh: Consumers' Perception and Consumption Habit Perspective. *Journal of Aquatic Food Product Technology* **2019**, *28*, 438–449, <https://doi.org/10.1080/10498850.2019.1597004>
14. Wang, O.; Somogyi, S.; Ablett, R. The Influences of Quality Attributes and Socio-Demographics on Chinese Consumers' General and Online Consumptions of Canadian, US and Australian Lobsters. *British Food Journal* **2021**, *123*, 2289–2306, <https://doi.org/10.1108/BFJ-12-2020-1101>
15. Wang, O.; Somogyi, S. Chinese Consumers and Shellfish: Associations between Perception, Quality, Attitude and Consumption. *Food Quality and Preference* **2018**, *66*, 52–63, <https://doi.org/10.1016/j.foodqual.2018.01.001>
16. Ahmed, A.F.; Mohamed, Z.; Ismail, M.M. Determinants of Fresh Fish Purchasing Behavior Among Malaysian Consumers. *Current Research Journal of Social Sciences* **2011**, *3*, 126–131.
17. Omar, M.; Mohd Adzahan, N.; Mohd Ghazali, H.; Karim, R.; Abdul Halim, N.M.; Ab Karim, S. Sustaining Traditional Food: Consumers' Perceptions on Physical Characteristics of Keropok Lekor or Fish Snack. *International Food Research Journal* **2011**, *18*, 117–124.
18. Sajeev, M.; Joshy, C.; Rejula, K.; Sajesh, V.; Suresh, A.; Mohanty, A.; Ravishankar, C. Drivers and Barriers to Online Fish Purchase in Kerala, India. *FISHERY TECHNOLOGY* **2021**, *58*, 246–256.
19. Wijayanto, D.; Bambang, A.N.; Wibowo, B.A.; Mudzakir, A.K. The Characteristics of Demand for Fresh Shrimp in Semarang City, Indonesia. *AACL Bioflux* **2021**, *14*, 1561–1569.
20. Linh, L.T.; Tam, L.M.; Ai, V.D.; Dzung, N.H. ASSESSING CONSUMER BEHAVIOR TOWARDS FISH SAUCE PRODUCTS BY USING FOOD CHOICE QUESTIONNAIRE. *JST* **2019**, *57*, 87, <https://doi.org/10.15625/2525-2518/57/3B/14411>
21. Castro, M.; Digal, L.; Bayogan, R.; Alcomendras, D. Consumer Preferences for Canned Tuna Products: The Case of the Largest Tuna-Producing City in the Philippines. *AFS* **2016**, *29*, <https://doi.org/10.33997/j.afs.2016.29.4.003>

22. Izzhati, D.N.; Mastrisiswadi, H.; Jazuli, J.; Talitha, T. Consumer Preferences for The Design of Smoked Fish Packaging Using Conjoint Analysis. *JITI* **2018**, *17*, 177, <https://doi.org/10.23917/jiti.v17i2.6778>
23. Rejula, K.; Sajeev, M.; Mohanty, A. Health Benefits, Quality and Safety of Fish in Kerala: Consumer Perception and Implications for Extension System. *IJEE* **2021**, *57*, <https://doi.org/10.48165/IJEE.2021.57301>
24. Mugaonkar, P.H.; Ananthan, P.S.; Samal, S.S.; Debnath, B. A Study on Consumer Behaviour at Organized Fish Retail Outlet. *Agricultural Economics Research Review* **2011**, *24*, 133–140.
25. Zaeema, A.; Hassan, Z. Factors Affecting Purchase Decision of Canned Tuna Brands in Maldives. *IJABM* **2016**, *4*, 12–144, <https://doi.org/10.24924/ijabm/2016.04/v4.iss1/120.144>
26. Sajiki, T.; Lu, Y.-H. Japanese Consumer Preference For Raw Fish: Best–Worst Scaling Method. *Journal of Marine Science and Technology* **2022**, *29*, 808–816, <https://doi.org/10.51400/2709-6998.2560>
27. Kitano, S.; Yamamoto, N. The Role of Consumer Knowledge, Experience, and Heterogeneity in Fish Consumption: Policy Lessons from Japan. *Journal of Retailing and Consumer Services* **2020**, *56*, <https://doi.org/10.1016/j.jretconser.2020.102151>
28. Mugaonkar, P.H.; Kumar, N.R.; Krishnan, M. Seafood Labelling: Awareness and Perception among Consumers of Organized Fish Retail Outlets in India. *Indian Journal of Marketing* **2013**, *43*, 5–13, <https://doi.org/10.17010/ijom/2013/v43/i11/80502>
29. Alam, M.A.; Alfnes, F. Consumer Preferences for Fish Attributes in Bangladesh: A Choice Experiment. *Journal of International Food and Agribusiness Marketing* **2020**, *32*, 425–440, <https://doi.org/10.1080/08974438.2019.1697409>
30. Arij, M. Conjoint Analysis of Consumer Preference for Bluefin Tuna. *Fisheries Science* **2010**, *76*, 1023–1028, <https://doi.org/10.1007/s12562-010-0297-4>
31. Hoque, M.Z. Sustainability Indicators for Sustainably-Farmed Fish in Bangladesh. *Sustainable Production and Consumption* **2021**, *27*, 115–127, <https://doi.org/10.1016/j.spc.2020.10.020>
32. Hoque, M.Z.; Akhter, N.; Mawa, Z. Consumers' Willingness to Pay (WTP) for Organically Farmed Fish in Bangladesh. *J. Agric. Appl. Econ.* **2021**, *53*, 482–509, <https://doi.org/10.1017/aae.2021.12>
33. Hoque, M.Z.; Alam, M.N. Consumers' Knowledge Discrepancy and Confusion in Intent to Purchase Farmed Fish. *British Food Journal* **2020**, *122*, 3567–3583, <https://doi.org/10.1108/BFJ-01-2019-0021>
34. Hoque, M.Z.; Bashir, M.A.; Akhter, F. Ambiguity Tolerance and Confusion Avoidance in the Intent to Purchase Farmed Fish. *Journal of Applied Aquaculture* **2021**, <https://doi.org/10.1080/10454438.2021.1872462>
35. Hori, J.; Wakamatsu, H.; Miyata, T.; Oozeki, Y. Has the Consumers Awareness of Sustainable Seafood Been Growing in Japan? Implications for Promoting Sustainable Consumerism at the Tokyo 2020 Olympics and Paralympics. *Marine Policy* **2020**, *115*, <https://doi.org/10.1016/j.marpol.2020.103851>
36. Karnad, D.; Gangadharan, D.; Krishna, Y.C. Rethinking Sustainability: From Seafood Consumption to Seafood Commons. *Geoforum* **2021**, *126*, 26–36, <https://doi.org/10.1016/j.geoforum.2021.07.019>
37. Kim, B.-T.; Lee, M.-K. Consumer Preference for Eco-Labeled Seafood in Korea. *Sustainability* **2018**, *10*, 3276, <https://doi.org/10.3390/su10093276>
38. Murakami, M.; Suzuki, M.; Yamaguchi, T. Presenting Information on Regulation Values Improves the Public's Sense of Safety: Perceived Mercury Risk in Fish and Shellfish and Its Effects on Consumption Intention. *PLoS ONE* **2017**, *12*, <https://doi.org/10.1371/journal.pone.0188758>
39. Prince, S.A.; Saira Wahid, I. The Purchase of Organic Fish in Bangladesh: Safeguarding against COVID-19. *Cogent Business and Management* **2020**, *7*, <https://doi.org/10.1080/23311975.2020.1841524>
40. Zheng, Q.; Wang, H.H.; Shogren, J.F. Fishing or Aquaculture? Chinese Consumers' Stated Preference for the Growing Environment of Salmon through a Choice Experiment and the Consequentiality Effect. *Marine Resource Economics* **2021**, *36*, 23–41, <https://doi.org/10.1086/711385>
41. Omar, N.A.; Abdullah, N.L.; Zainol, Z.; Nazri, M.A. Consumers' Responsiveness towards Contaminated Canned Sardine in Malaysia: Does Perceived Severity Matter? *Food Control* **2021**, *123*, <https://doi.org/10.1016/j.foodcont.2020.107780>
42. Sayeed, Z.; Sugino, H.; Sakai, Y.; Yagi, N. Consumer Preferences and Willingness to Pay for Mud Crabs in Southeast Asian Countries: A Discrete Choice Experiment. *Foods* **2021**, *10*, <https://doi.org/10.3390/foods10112873>
43. Tan, R.D. Comparing Awareness and Behaviour Towards Food Consumption Trends: Gender Differences among Milkfish, Chanos Chanos (Forsskal 1775), Purchase Decision Makers in the Province of Iloilo, Philippines. *AFS* **2017**, *30S*, 291–301. <https://doi.org/10.33997/j.afs.2017.30.S1.016>

44. Uchida, H.; Onozaka, Y.; Morita, T.; Managi, S. Demand for Ecolabeled Seafood in the Japanese Market: A Conjoint Analysis of the Impact of Information and Interaction with Other Labels. *Food Policy* **2014**, *44*, 68–76, <https://doi.org/10.1016/j.foodpol.2013.10.002>
45. Wakamatsu, H.; Anderson, C.M.; Uchida, H.; Roheim, C.A. Pricing Ecolabeled Seafood Products with Heterogeneous Preferences: An Auction Experiment in Japan. *Marine Resource Economics* **2017**, *32*, 277–294, <https://doi.org/10.1086/692029>
46. Wakamatsu, H.; Miyata, T. Reputational Damage and the Fukushima Disaster: An Analysis of Seafood in Japan. *Fisheries Science* **2017**, *83*, 1049–1057, <https://doi.org/10.1007/s12562-017-1129-6>
47. Xu, P.; Zeng, Y.; Fong, Q.; Lone, T.; Liu, Y. Chinese Consumers' Willingness to Pay for Green- and Eco-Labeled Seafood. *Food Control* **2012**, *28*, 74–82, <https://doi.org/10.1016/j.foodcont.2012.04.008>
48. Xuan, B.; Sandorf, E.; Ngoc, Q. Stakeholder Perceptions towards Sustainable Shrimp Aquaculture in Vietnam. *JOURNAL OF ENVIRONMENTAL MANAGEMENT* **2021**, *290*, <https://doi.org/10.1016/j.jenvman.2021.112585>
49. Xuan, B.B. Consumer Preference for Eco-Labelled Aquaculture Products in Vietnam. *Aquaculture* **2021**, *532*, <https://doi.org/10.1016/j.aquaculture.2020.736111>
50. Yi, S. Determinants of Consumers' Purchasing Behavior for Certified Aquaculture Products in South Korea. *Sustainability* **2019**, *11*, 3840, <https://doi.org/10.3390/su11143840>
51. Yi, S. Willingness to Pay for Sustainable Aquaculture Products: Evidence from Korean Red Seabream Aquaculture. *Sustainability* **2019**, *11*, 1577, <https://doi.org/10.3390/su11061577>
52. Yin, S.; Han, F.; Chen, M.; Li, K.; Li, Q. Chinese Urban Consumers' Preferences for White Shrimp: Interactions between Organic Labels and Traceable Information. *Aquaculture* **2020**, *521*, <https://doi.org/10.1016/j.aquaculture.2020.735047>
53. Zhang, X.; Fang, Y.; Gao, Z. Accounting for Attribute Non-Attendance (ANA) in Chinese Consumers' Away-from-Home Sustainable Salmon Consumption. *Marine Resource Economics* **2020**, *35*, 263–284, <https://doi.org/10.1086/709458>
54. Peng, J.; Min, S.; Qing, P.; Yang, M. The Impacts of Urbanization and Dietary Knowledge on Seaweed Consumption in China. *Foods* **2021**, *10*, 1373, <https://doi.org/10.3390/foods10061373>
55. Ghosh, A.; Dana, S.; Sharma, A.; Das, S. A Study on Consumers Preference and Satisfaction towards Ready-to-Eat Fish Products in West Bengal, India. *FISHERY TECHNOLOGY* **2018**, *55*, 282–287.
56. Abidin, Z.; Setiawan, B.; Muhaimin, A.W.; Shinta, A.; Nandayani, D.R. Millennial Consumer Behavior on Purchasing of Fishery Functional Food at Tokopedia: Testing the Theory of Planned Behavior. In Proceedings of the IOP Conference Series: Earth and Environmental Science; March 1 2021; Vol. 718, p. 012073.
57. Chen, T.; Wang, H. Consumers' Purchase Intention of Wild Freshwater Fish in China from the Perspective of Ecological Protection. *British Food Journal* **2021**, *124*, 10, 3308–3322. <https://doi.org/10.1108/BFJ-05-2021-0596>
58. Dai, Y.; Yuan, Y.-M.; Yuan, Y.; Zhou, Z.; Zhang, H. Factors Influencing Chinese Consumer Attitudes on the Safety of Aquatic Products. *Journal of the World Aquaculture Society* **2021**, *53*, 47–59. <https://doi.org/10.1111/jwas.12823>
59. Fiandari, Y.R.; Surachman, S.; Rohman, F.; Hussein, A.S. Perceived Value Dimension in Repetitive Fish Consumption in Indonesia by Using an Extended Theory of Planned Behavior. *British Food Journal* **2019**, *121*, 1220–1235, <https://doi.org/10.1108/BFJ-07-2018-0429>
60. Gajaria, T.K.; Mantri, V.A. Perspectives and Attitudes towards the Functional and Safety Aspects of Seaweeds for Edible Applications in India. *Foods* **2021**, *10*, <https://doi.org/10.3390/foods10123026>
61. Ghifarini, A.; Sumarwan, U.; Najib, M. APPLICATION OF THEORY OF PLANNED BEHAVIOR IN SHRIMP CONSUMER BEHAVIOR ANALYSIS. *INDEPENDENT JOURNAL OF MANAGEMENT & PRODUCTION* **2018**, *9*, 984–1001, <https://doi.org/10.14807/ijmp.v9i3.705>
62. Li, Y.; Zhong, C. Factors Driving Consumption Behavior for Green Aquatic Products: Empirical Research from Ningbo, China. *British Food Journal* **2017**, *119*, 1442–1458, <https://doi.org/10.1108/BFJ-10-2016-0456>
63. Novita; Rowena, J. Determinant Factors of Indonesian People's Fish Purchase Intention. *British Food Journal* **2019**, *123*, 2272–2277, <https://doi.org/10.1108/BFJ-01-2019-0067>
64. Pethiyagoda, N.; Olsen, S. Explaining Fish Consumption Behavior In Sri-Lanka: The Role Of Consideration Set Size, Attitude, Knowledge, Con-Venience Orientation, Price Consciousness, And Variety Seeking Tendency. *Trop Agric Res & Ext* **2013**, *15*, 19, <https://doi.org/10.4038/tare.v15i3.5252>

65. Quan, S.; Zeng, Y.; Huang, B.; Yabe, M. Chinese Consumers' Purchase Intention of Eco-Labeled Fish : Based on a Survey to Consumers in Beijing. *Journal of the Faculty of Agriculture, Kyushu University* **2014**, *59*, 205–213, <https://doi.org/10.5109/1434412>
66. Siddique, M.A.M. Explaining the Role of Perceived Risk, Knowledge, Price, and Cost in Dry Fish Consumption Within the Theory of Planned Behavior. *Journal of Global Marketing* **2012**, *25*, 181–201, <https://doi.org/10.1080/08911762.2012.743203>
67. Thong, N.T.; Olsen, S.O. Attitude toward and Consumption of Fish in Vietnam. *Journal of Food Products Marketing* **2012**, *18*, 79–95, <https://doi.org/10.1080/10454446.2012.653778>
68. Wang, O.; Somogyi, S. Consumer Adoption of Sustainable Shellfish in China: Effects of Psychological Factors and Segmentation. *Journal of Cleaner Production* **2019**, *206*, 966–975, <https://doi.org/10.1016/j.jclepro.2018.09.189>
69. Fauziyah, N.S. The Influence of Parents and Other Factors on Adolescents' Fish Consumption in Selected Senior High School Students, Jakarta. *IJPHRD* **2020**, <https://doi.org/10.37506/ijphrd.v11i5.9442>
70. Junaidi, J.; Ilona, D.; Zaitul, Z. Fresh Fish Consumption Behaviour in Padang City, Indonesia. *ECsOFiM* **2020**, *007*, 197–211, <https://doi.org/10.21776/ub.ecsofim.2020.007.02.06>
71. Ho Huy, T.; Anh, N.T.; Svein, O.; Vassdal, T. Explaining Repurchase Intention towards Fish: the Extension of the theory of Planned Behavior; International Institute of Fisheries Economics and Trade. Oregon, USA, 2013.
72. Duy, B.T.; Ai, T.H. PURCHASE BEHAVIOR OF ORGANIC SEAFOOD CONSUMERS IN VIETNAM. *EUrASEANs* **2019**, 51–60, [https://doi.org/10.35678/2539-5645.1\(14\).2019.51-60](https://doi.org/10.35678/2539-5645.1(14).2019.51-60)
73. Rotuauli, T.F.; Handaka, A.A.; Rizal, A.; Nurhayati, A. Consumer Behavior Analysis in Purchase of Freshwater Fish in Bandung City (Case Study in the Traditional Market of Kosambi). *AJFAR* **2020**, 1–8, <https://doi.org/10.9734/ajfar/2020/v6i330096>
74. Mugaonkar, P.; Kumar, N.; Shelar, G.; Polanco, J.; Ramsubramanian, V.; Biradar, R. A Case Study on the Non-Price Factors and Consumer Behaviour for Pangasius (Pangasianodon Hypophthalmus) (Valenciennes, 1840) Consumption in Pune City, India. *FISHERY TECHNOLOGY* **2017**, *54*, 279–286.
75. Danso, G.; Otoo, M.; Linh, N.; Madurangi, G. Households' Willingness-to-Pay for Fish Product Attributes and Implications for Market Feasibility of Wastewater-Based Aquaculture Businesses in Hanoi, Vietnam. *Resources* **2017**, *6*, 30, <https://doi.org/10.3390/resources6030030>
76. Ahmad, N.I.; Wan Mahiyuddin, W.R.; Tengku Mohamad, T.R.; Ling, C.Y.; Daud, S.F.; Hussein, N.C.; Abdullah, N.A.; Shaharudin, R.; Sulaiman, L.H. Fish Consumption Pattern among Adults of Different Ethnicities in Peninsular Malaysia. *Food & Nutrition Research* **2016**, *60*, 32697, <https://doi.org/10.3402/fnr.v60.32697>
77. Arthathiani, F.Y.; Luhur, E.S.; Wardono, B.; Yulisti, M. Socio-Economic Determinants of Preserved Fish Consumption in Java Island: SUSENAS Data Analysis 2019. In IOP Conference Series: Earth and Environmental Science, 2021; Vol. 870, 1, 012046. <https://doi.org/10.1088/1755-1315/870/1/012046>
78. Devadawson, C.; Jayasinghe, C.; Sivakanesan, R. SOCIO-DEMOGRAPHIC FACTORS AND FISH EATING TRENDS IN EASTERN COMMUNITY, SRI LANKA. *JOURNAL OF EXPERIMENTAL BIOLOGY AND AGRICULTURAL SCIENCES* **2015**, *3*, 423–429, [https://doi.org/10.18006/2015.3\(5\).423.429](https://doi.org/10.18006/2015.3(5).423.429)
79. Fu, Y.; Huang, S.; Wu, Z.; Wang, C.; Su, M.; Wang, X.; Xu, P.; Huang, X.; Wu, H.; Wang, Y.; et al. Socio-demographic Drivers and Public Perceptions of Consumption and Conservation of Asian Horseshoe Crabs in Northern Beibu Gulf, China. *Aquatic Conserv: Mar Freshw Ecosyst* **2019**, *29*, 1268–1277, <https://doi.org/10.1002/aqc.3125>
80. Haque, M.E.; Khanom, S.; Afrad, M.S.I.; Barau, A.A.; Rafiquzzaman, S. Consumer Preference for Sea Fish Consumption in Dhaka City of Bangladesh. *Agriculturists* **2019**, *17*, 41–51, <https://doi.org/10.3329/agric.v17i1-2.44695>
81. Hoa, V.T.; Käre, S. Preference-Based Segmentation: A Study of Dish Preferences among Vietnamese Teenagers. *Journal of Economic Development* **2017**, *24*, 132–153, <https://doi.org/10.24311/JABES/2017.24.2.02>
82. Islam, M.J.; Sayeed, M.A.; Akhtar, S.; Hossain, M.S.; Liza, A.A. Consumers Profile Analysis towards Chicken, Beef, Mutton, Fish and Egg Consumption in Bangladesh. *British Food Journal* **2018**, *120*, 2818–2831, <https://doi.org/10.1108/BFJ-03-2018-0191>
83. Kashem, Md.A.; Tasnim, N.; Rahman, M.; Bapary, M.A.J.; Akanda, Md.A. Consumer's Attitudes toward Fish Consumption during Pandemic Covid-19 in Bangladesh. *International Journal of Natural Sciences* **2021**, *11*, 15–22.

84. Lee, M.-K.; Nam, J. The Determinants of Live Fish Consumption Frequency in South Korea. *Food Research International* **2019**, *120*, 382–388, <https://doi.org/10.1016/j.foodres.2019.03.005>
85. Poti, M.; Long, S.L.; Rusli, M.U.; Jani, J.M.; Hugé, J.; Dahdouh-Guebas, F. Changing Trends and Perceptions of Sea Turtle Egg Consumption in Redang Island, Malaysia. *Ecology and Society* **2021**, *26*, <https://doi.org/10.5751/ES-12717-260414>
86. Rahman, M.N.; Islam, A.R.M.T. Consumer Fish Consumption Preferences and Contributing Factors: Empirical Evidence from Rangpur City Corporation, Bangladesh. *Heliyon* **2020**, *6*, <https://doi.org/10.1016/j.heliyon.2020.e05864>
87. Sajeev, M.V.; Radhakrishnan, A.; Mohanty, A.K.; Joshy, C.G.; Akber Ali, V.P.; Gopika, R.; Mathew, S.; Ravishankar, C.N. Factors Influencing the Fish Consumption Preferences: Understandings from the Tribes of Wayanad, Kerala. *IJEE* **2021**, *57*, 23–27, <https://doi.org/10.48165/IJEE.2021.57405>
88. Shashikanth H, M.; Somashekar, D. Survey of Fish Consumption Pattern in Households of Shivamogga, Karnataka. *Glob J Zool* **2020**, 022–024, <https://doi.org/10.17352/gjz.000016>
89. Supartini, A.; Oishi, T.; Yagi, N. Changes in Fish Consumption Desire and Its Factors: A Comparison between the United Kingdom and Singapore. *Foods* **2018**, *7*, <https://doi.org/10.3390/foods7070097>
90. Zhou, L.; Jin, S.; Zhang, B.; Cheng, G.; Zeng, Q.; Wang, D. Determinants of Fish Consumption by Household Type in China. *British Food Journal* **2015**, *117*, 1273–1288, <https://doi.org/10.1108/BFJ-05-2014-0182>
91. Yadav, S.; Fisam, A.; Dacks, R.; Madin, J.S.; Mawyer, A. Shifting Fish Consumption Preferences Can Impact Coral Reef Resilience in the Maldives: A Case Study. *Marine Policy* **2021**, *134*, <https://doi.org/10.1016/j.marpol.2021.104773>
92. Tezzo, X.; Aung, H.M.; Belton, B.; Oosterveer, P.; Bush, S.R. Consumption Practices in Transition: Rural-Urban Migration and the Food Fish System in Myanmar. *Geoforum* **2021**, *127*, 33–45, <https://doi.org/10.1016/j.geoforum.2021.09.013>
93. Salim, S.S.; Monolisha, S.; Sunil, P.V. Fish Consumption: Gauging the Determinants of Consumption and Buying Patterns across Kerala Markets. *J. Mar. Biol. Ass. India* **2020**, *62*, 33–40, <https://doi.org/10.6024/jmbai.2020.62.1.2114-03>
94. Goh, E.V.; Ali, S.A.; Mitra, S.R.; McCullough, F. Understanding the Patterns of Fish and Seafood Consumption and Its Nutritional Roles among a Malaysian Population to Inform Sustainable Development. *apjsafe* **2013**, *9*, 1–13, <https://doi.org/10.36782/apjsafe.v9i1.86>
95. Salim, S.S. Demand Pattern and Willingness to Pay for High Value Fish Consumption: Case Study from Selected Coastal Cities in Kerala, South India. *Indian Journal of Fisheries* **2020**, *67*, 135–143, <https://doi.org/10.21077/ijf.2020.67.3.70635-15>
96. Zhang, H.; Sun, C.; Wang, Z.; Che, B. Seafood Consumption Patterns and Affecting Factors in Urban China: A Field Survey from Six Cities. *Aquaculture Reports* **2021**, *19*, <https://doi.org/10.1016/j.aqrep.2021.100608>
97. Huang, J.; Antonides, G.; Nie, F. Social-Psychological Factors in Food Consumption of Rural Residents: The Role of Perceived Need and Habit within the Theory of Planned Behavior. *Nutrients* **2020**, *12*, <https://doi.org/10.3390/nu12041203>
98. Zheng, Q.; Weng, H.; Fong, Q.; Lu, Y. *Consumer Preference and Market Potential for Alaska Salmon in China: Preliminary Analysis*; Alaska Sea Grant, University of Alaska Fairbanks, 2017;
99. Zheng, Q.; Wang, H.H.; Lu, Y. Consumer Purchase Intentions for Sustainable Wild Salmon in the Chinese Market and Implications for Agribusiness Decisions. *Sustainability (Switzerland)* **2018**, *10*, <https://doi.org/10.3390/su10051377>
100. Wang, O.; Somogyi, S.; Ablett, R. General Image, Perceptions and Consumer Segments of Luxury Seafood in China: A Case Study for Lobster. *British Food Journal* **2018**, *120*, 969–983, <https://doi.org/10.1108/BFJ-07-2017-0379>
101. Wang, O.; Somogyi, S. Motives for Luxury Seafood Consumption in First-Tier Cities in China. *Food Quality and Preference* **2020**, *79*, <https://doi.org/10.1016/j.foodqual.2019.103780>
102. Skallerud, K.; Myrland, Ø.; Olsen, S.O. Buying Norwegian Salmon: A Cross-Cultural Study of Store Choice Behavior. *Journal of Food Products Marketing* **2012**, *18*, 257–267, <https://doi.org/10.1080/10454446.2012.684328>
103. Meng, T.; Wang, C.; Florkowski, W.J.; Yang, Z. Determinants of Urban Consumer Expenditure on Aquatic Products in Shanghai, China. *Aquaculture Economics and Management* **2021**, *12*, 1–24, <https://doi.org/10.1080/13657305.2021.1996480>



104. Juwitaningtyas, T.; Supartono, W.; Aziz, I.W.F. Consumer's Valuation of the Traditional Fish Handling Practices Using Importance-Performance Analysis. In Proceedings of the IOP Conference Series: Materials Science and Engineering; October 9 2018; Vol. 403, p. 012008.
105. Hu, Y.; Yuan, C. An Online Survey Study of Consumer Preferences on Aquatic Products in China: Current Seafood Consumption Patterns and Trends. *Fish Aquac J* **2015**, *05*, <https://doi.org/10.4172/2150-3508.1000094>
106. Farradia, Y.; Sunarno, M.T.D. Consumer Purchase Decision on Fresh Fish in the New Norm: Preliminary Case Study in Indonesia. *JSTARD* **2020**, *2*, <https://doi.org/10.30880/jstard.2020.02.01.006>
107. Fabinyi, M.; Liu, N.; Song, Q.; Li, R. Aquatic Product Consumption Patterns and Perceptions among the Chinese Middle Class. *Regional Studies in Marine Science* **2016**, *7*, 1–9, <https://doi.org/10.1016/j.rsma.2016.01.013>
108. Fabinyi, M.; Liu, N. Seafood Banquets in Beijing: Consumer Perspectives and Implications for Environmental Sustainability. *Conservation and Society* **2014**, *12*, 218–228, <https://doi.org/10.4103/0972-4923.138423>
109. Fabinyi, M.; Liu, N. The Social Context of the Chinese Food System: An Ethnographic Study of the Beijing Seafood Market. *Sustainability (Switzerland)* **2016**, *8*, <https://doi.org/10.3390/su8030244>
110. Newton, R.; Zhang, W.; Xian, Z.; McAdam, B.; Little, D.C. Intensification, Regulation and Diversification: The Changing Face of Inland Aquaculture in China. *Ambio* **2021**, *50*, 1739–1756, <https://doi.org/10.1007/s13280-021-01503-3>
111. Altintzoglou, T.; Heide, M.; Wien, A.H.; Honkanen, P. Traditional Sushi for Modern Consumers: A Comparison Between Sushi Consumption Behavior in Japan and Norway. *Journal of Food Products Marketing* **2016**, *22*, 717–732, <https://doi.org/10.1080/10454446.2015.1121434>
